# Supplementary material for: On the estimation of population cause-specific mortality fractions from in-hospital deaths
Source: Springer Nature journal article supplement (doi:10.1186/s12916-019-1267-z), 2019-02-07
Supplement: MOESM2 [file 16460152]

## CAUSE OF DEATH (COD) STUDY COVARIATES INFORMATION OF DEATHS CHANDPUR DISTRICT, BANGLADESH

### 1. INFORMATION ABOUT THE DECEASED

Upazila: \_\_\_\_\_ Village/Moholla: \_\_\_\_\_ Bari/Holding# \_\_\_\_\_

|      |                                                                                                                |                                                                                            |                                                                                                                          |                                                               |                         |
|------|----------------------------------------------------------------------------------------------------------------|--------------------------------------------------------------------------------------------|--------------------------------------------------------------------------------------------------------------------------|---------------------------------------------------------------|-------------------------|
| 1.1  | Name of the deceased                                                                                           |                                                                                            | RID: _____                                                                                                               |                                                               |                         |
|      |                                                                                                                |                                                                                            | CID: _____                                                                                                               |                                                               |                         |
| 1.2  | Date of death                                                                                                  |                                                                                            | __  __ <br>dd                                                                                                            | __  __ <br>mm                                                 | __  __  __  __ <br>yyyy |
| 1.3  | Date of birth: Age _____ years                                                                                 |                                                                                            | __  __ <br>dd                                                                                                            | __  __ <br>mm                                                 | __  __  __  __ <br>yyyy |
| 1.4  | Sex                                                                                                            |                                                                                            | Code: 1 = Male, 2 = Female <span style="float: right;"> __ </span>                                                       |                                                               |                         |
| 1.5  | Marital status (for 12 yrs old and above)                                                                      |                                                                                            | Code: 1 = Never married, 2 = Married, 3 = Divorced<br>4 = Separated, 5 = Widowed <span style="float: right;"> __ </span> |                                                               |                         |
| 1.6  | Religion                                                                                                       | Codes: 1 = Islam, 2 = Hindu, 3 = Buddhist, 4 = Christianity,<br>5 = Others (specify) _____ |                                                                                                                          |                                                               | __                      |
| 1.7  | Municipality/Pourasava of residence                                                                            | Yes = 01, No = 02, Don't know = 03                                                         |                                                                                                                          |                                                               | __  __                  |
| 1.8  | Number of years of schooling completed (passed)                                                                |                                                                                            |                                                                                                                          |                                                               | __  __                  |
| 1.9  | Was s/he continuing the schooling?                                                                             |                                                                                            |                                                                                                                          | Yes = 01, No = 02 <span style="float: right;"> __  __ </span> |                         |
| 1.10 | Occupation at time of death (most recent occupation) for deceased more than 10 years old, please specify _____ |                                                                                            |                                                                                                                          |                                                               | __  __  __              |
|      | If deceased was <12 yrs old                                                                                    | Mother                                                                                     |                                                                                                                          | Father                                                        |                         |
| 1.11 | Name/ CID                                                                                                      |                                                                                            |                                                                                                                          |                                                               |                         |
| 1.12 | Date of birth                                                                                                  |                                                                                            |                                                                                                                          |                                                               |                         |
| 1.13 | Education (class passed)                                                                                       |                                                                                            |                                                                                                                          |                                                               |                         |
| 1.14 | HDSS occupation and code                                                                                       |                                                                                            | __  __  __                                                                                                               | __  __  __                                                    |                         |
| 1.15 | Marital status<br>Codes: 1 = Never married, 2 = Married, 3 = Divorced, 4 = Separated, 5 = Widowed              |                                                                                            |                                                                                                                          |                                                               | __                      |

### 2. INFORMATION ABOUT THE HOUSEHOLD HEAD

|     |                                                    |  |                                                                                                                          |                      |                         |
|-----|----------------------------------------------------|--|--------------------------------------------------------------------------------------------------------------------------|----------------------|-------------------------|
| 2.1 | Name of the HH head & CID                          |  | CID: _____                                                                                                               |                      |                         |
| 2.2 | Date of Birth: Age _____ years                     |  | __  __ <br>dd                                                                                                            | __  __ <br>mm        | __  __  __  __ <br>yyyy |
| 2.3 | Sex                                                |  | Code: 1 = Male, 2 = Female <span style="float: right;"> __ </span>                                                       |                      |                         |
| 2.4 | Marital status (for 12 yrs old and above)          |  | Code: 1 = Never married, 2 = Married<br>3 = Divorced, 4 = Separated, 5 = Widowed <span style="float: right;"> __ </span> |                      |                         |
| 2.5 | Education (class passed) _____                     |  |                                                                                                                          |                      | __  __                  |
| 2.6 | HDSS occupation and code _____                     |  |                                                                                                                          |                      | __  __  __              |
| 2.7 | Does any household member have a health insurance? |  |                                                                                                                          | __  1=Yes  __  2= No |                         |
| 2.8 | If yes, specify the insurance .....                |  |                                                                                                                          |                      |                         |

|| || || || ||

**3. TRAVEL TIME TO UPAZILA HEALTH COMPLEX (UHC)/DISTRICT HOSPITAL (DH) / PRIVATE CLINIC (PC)/ OTHER HOSPITAL (OH), FOR HOSPITAL DEATH ONLY**

|     |                                                                                                                                                          |                                              |                         |
|-----|----------------------------------------------------------------------------------------------------------------------------------------------------------|----------------------------------------------|-------------------------|
| 3.1 | Distance of residence at time of terminal illness to UHC/DH / PC/ OH in kilometers (Information on distance will be validated from existing information) | _1_   _2_   _3_   _4_ <br>UHC DH PC OH<br>Km |                         |
| 3.2 | Did you bring the deceased directly to UHC/DH/ PC/ OH?                                                                                                   | _   1 Yes<br>CONTINUE                        | _   2 No<br>SKIP TO 3.5 |
| 3.3 | If Yes, how long did you have to travel from your house to UHC/DH/PC/OH in minutes?                                                                      | VERBATIM                                     |                         |
| 3.4 | How much did you spend to travel to UHC/DH /PC/OH in taka?<br><b>TERMINATE INTERVIEW</b>                                                                 | VERBATIM                                     |                         |
| 3.5 | If NO, to which hospital, health facility or physician, did you bring her/him to <b>FIRST</b> before s/he was moved to UHC/DH/ PC/ OH                    | VERBATIM                                     |                         |
| 3.6 | How long did you have to travel from your house to this facility in minutes?                                                                             | VERBATIM                                     |                         |
| 3.7 | How much did it cost you to travel from your house to this facility in taka?                                                                             | VERBATIM                                     |                         |
| 3.8 | How long did you have to travel from this facility to UHC/DH/ PC/ OH in minutes?                                                                         | VERBATIM                                     |                         |
| 3.9 | How much did it cost you to travel from this facility to UHC/DH/ PC/ OH in taka?                                                                         | VERBATIM                                     |                         |

**4. HOUSEHOLD ASSETS**

|     |                               |                                                                                                                                                                                                                                                                                                                                                                     |                            |           |
|-----|-------------------------------|---------------------------------------------------------------------------------------------------------------------------------------------------------------------------------------------------------------------------------------------------------------------------------------------------------------------------------------------------------------------|----------------------------|-----------|
| 4.1 | Land own (in decimal)         | Homestead<br>                                                                                                                                                                                                                                                                                                                                                       | Agriculture and others<br> | Total<br> |
| 4.2 | Number of HH members          |                                                                                                                                                                                                                                                                                                                                                                     |                            |           |
| 4.3 | Number of sleeping rooms      |                                                                                                                                                                                                                                                                                                                                                                     |                            |           |
| 4.4 | Main source of drinking water | 01 Tube well (green)<br>02 Tube well (red)<br>03 Tube well (not yet tested)<br>04 Deep tube well (600+ feet)<br>05 Pond / River/Ditch/Canal<br>06 PSF/RSF (Pond Sand Filter/River Sand Filter)<br>07 Three pitchers<br>08 Rain water<br>09 Other water filters<br>10 Piped water from own house<br>11 Piped water from neighbor/ public taps<br>12 Others (specify) |                            |           |

|      |                                    |                                                                                                                                                                                                          |      |                                |                                                                                                                                        |  |  |  |      |      |       |
|------|------------------------------------|----------------------------------------------------------------------------------------------------------------------------------------------------------------------------------------------------------|------|--------------------------------|----------------------------------------------------------------------------------------------------------------------------------------|--|--|--|------|------|-------|
| 4.5  | Toilet type used by females        | 01 Sanitary latrine<br>02 Ring/ Slab but waste not drained out<br>03 Ring/ Slab but waste drained out<br>04 <i>Pacca</i> latrine but waste drained out<br>05 <i>Kancha</i> latrine<br>06 Other (specify) |      |                                |                                                                                                                                        |  |  |  |      |      |       |
| 4.6  | Fuel used for cooking              | 01 Gas<br>02 Firewood/straw/charcoal<br>03 Cow dung/leaves<br>04 LPG gas<br>05 Electricity<br>06 Kerosine<br>07 Other                                                                                    |      |                                |                                                                                                                                        |  |  |  |      |      |       |
| 4.7  | Housing materials (dwelling):      | 01 Earth/Mud<br>02 Cement/Tiles<br>03 Tin<br>04 Thatch/Straw/Leaves<br>05 Scrap materials/Sack/Polythine<br>06 Wood<br>07 Bamboo<br>08 Other, specify .....                                              |      |                                | <table border="1"> <tr> <td>    </td> <td>    </td> <td>    </td> </tr> <tr> <td>Roof</td> <td>Wall</td> <td>Floor</td> </tr> </table> |  |  |  | Roof | Wall | Floor |
|      |                                    |                                                                                                                                                                                                          |      |                                |                                                                                                                                        |  |  |  |      |      |       |
| Roof | Wall                               | Floor                                                                                                                                                                                                    |      |                                |                                                                                                                                        |  |  |  |      |      |       |
|      |                                    | 1 = Yes<br>2 = No                                                                                                                                                                                        |      |                                | 1 = Yes<br>2 = No                                                                                                                      |  |  |  |      |      |       |
| 4.8  | Separate cooking room ?            |                                                                                                                                                                                                          | 4.26 | Own pump for irrigation?       |                                                                                                                                        |  |  |  |      |      |       |
| 4.9  | Have lantern ( <i>Hurricane</i> )? |                                                                                                                                                                                                          | 4.27 | Own thresher machine?          |                                                                                                                                        |  |  |  |      |      |       |
| 4.10 | Have quilt/blanket?                |                                                                                                                                                                                                          | 4.28 | Have solar panel (connection)? |                                                                                                                                        |  |  |  |      |      |       |
| 4.11 | Have mattress?                     |                                                                                                                                                                                                          | 4.29 | Own a sewing machine?          |                                                                                                                                        |  |  |  |      |      |       |
| 4.12 | Have bed stand (khat/chowki)?      |                                                                                                                                                                                                          | 4.30 | Own a CD/VCD/DVD player?       |                                                                                                                                        |  |  |  |      |      |       |
| 4.13 | Have chair/table?                  |                                                                                                                                                                                                          | 4.31 | Own landline phone?            |                                                                                                                                        |  |  |  |      |      |       |
| 4.14 | Have rickshaw/rickshaw van?        |                                                                                                                                                                                                          | 4.32 | Own a country boat             |                                                                                                                                        |  |  |  |      |      |       |
| 4.15 | Own bicycle?                       |                                                                                                                                                                                                          | 4.33 | Own a motorboat?               |                                                                                                                                        |  |  |  |      |      |       |
| 4.16 | Own mobile phone?                  |                                                                                                                                                                                                          | 4.34 | Have fishing net?              |                                                                                                                                        |  |  |  |      |      |       |
| 4.17 | Have dining table?                 |                                                                                                                                                                                                          | 4.35 | Have chicken/duck? (mention #) |                                                                                                                                        |  |  |  |      |      |       |
| 4.18 | Have showcase/almirah?             |                                                                                                                                                                                                          | 4.36 | Have cow/goat? (mention #)     |                                                                                                                                        |  |  |  |      |      |       |
| 4.19 | Have sofa set?                     |                                                                                                                                                                                                          | 4.37 | Own a shop?                    |                                                                                                                                        |  |  |  |      |      |       |
| 4.20 | Have electricity?                  |                                                                                                                                                                                                          | 4.38 | Own fridge/refrigerator?       |                                                                                                                                        |  |  |  |      |      |       |
| 4.21 | Have electric fan?                 |                                                                                                                                                                                                          | 4.39 | Own a motorcycle?              |                                                                                                                                        |  |  |  |      |      |       |
| 4.22 | Own radio?                         |                                                                                                                                                                                                          | 4.40 | IPS (Instant Power Supply)     |                                                                                                                                        |  |  |  |      |      |       |
| 4.23 | Own television?                    |                                                                                                                                                                                                          | 4.41 | Own a computer?                |                                                                                                                                        |  |  |  |      |      |       |
| 4.24 | Auto rickshaw: CNG/ Battery/Petrol |                                                                                                                                                                                                          | 4.42 | Own a car?                     |                                                                                                                                        |  |  |  |      |      |       |
| 4.25 | Own power tiller?                  |                                                                                                                                                                                                          | 4.43 | Generator                      |                                                                                                                                        |  |  |  |      |      |       |

Name of Interviewer: \_\_\_\_\_ Code |\_\_|\_\_|\_\_|

Date of Household Visit |\_\_|\_\_| |\_\_|\_\_| |\_\_|\_\_|\_\_|\_\_|  
 dd mm yyyy
